# Supplementary material
Source: MDPI journal article supplement (https://www.mdpi.com/2073-4344/13/6/949)
Supplement: s1 [file s1]

## Article

## Supplementary Materials

# Improving the Stability of Ru-doped Ni-Based Catalysts for Steam-Methane Reforming during daily startup and shutdown operation

Tae-Young Kim <sup>1,†</sup>, Jong-Heon Lee <sup>2,†</sup>, Seongbin Jo <sup>3</sup>, Jueon Kim <sup>2</sup>, Jin-Hyeok Woo <sup>2</sup>, Ragupathy Dhanusuraman <sup>4</sup>, Jae-Chang Kim <sup>2,\*</sup>, and Soo-Chool Lee <sup>1,\*</sup>

<sup>1</sup> Research Institute of Advanced Energy Technology, Kyungpook National University, Daegu, 41566, Republic of Korea; tyoung0218@knu.ac.kr (T.-Y.K.)

<sup>2</sup> Department of Chemical Engineering, Kyungpook National University, Daegu, 41566, Republic of Korea; rnswna123@knu.ac.kr (J.-H.L.); lawliet@knu.ac.kr (J.K.); wjh8865@knu.ac.kr (J.-H.W.)

<sup>3</sup> Department of Chemical and Environmental Engineering, University of California–Riverside, Riverside, California 92521, United States; [sjo016@ucr.edu](mailto:sjo016@ucr.edu) (S.J.)

<sup>4</sup> Nano Electrochemistry Lab (NEL), Department of Chemistry, National Institute of Technology Puducherry, Karaikal, 609-609, India; [ragu.nitpy@gmail.com](mailto:ragu.nitpy@gmail.com) (R.D.)

\* Correspondence: [kjchang@knu.ac.kr](mailto:kjchang@knu.ac.kr) (J.-C.K.) and [soochool@knu.ac.kr](mailto:soochool@knu.ac.kr) (S.-C.L.)

† Tae-Young Kim and Jong-Heon Lee contributed equally to this work.

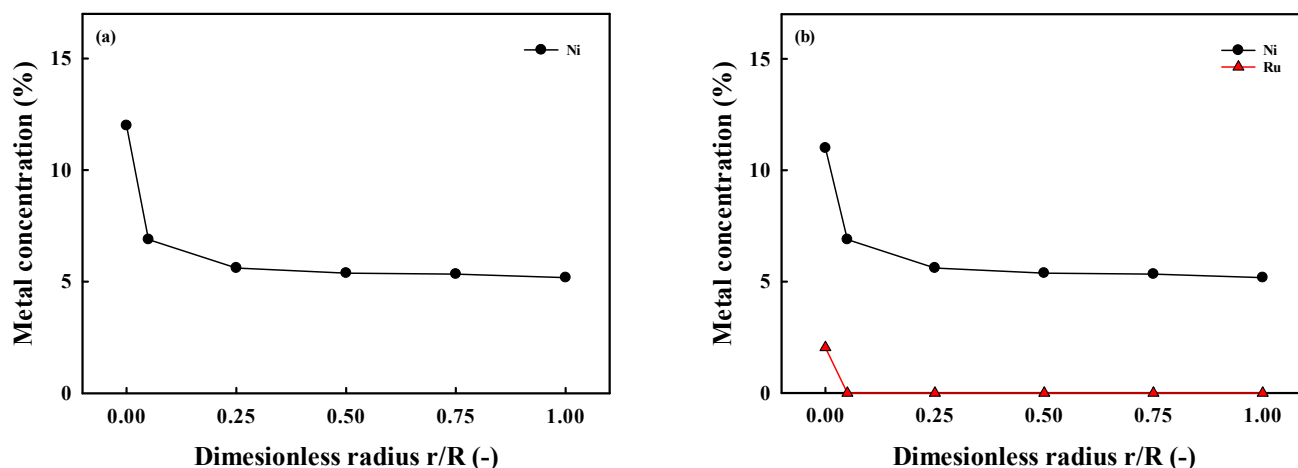

Figure S1. Metal concentration profile measured in prepared catalysts by SEM-EDS: (a) Ni/Al<sub>2</sub>O<sub>3</sub> and (b) Ru-Ni/Al<sub>2</sub>O<sub>3</sub> catalysts

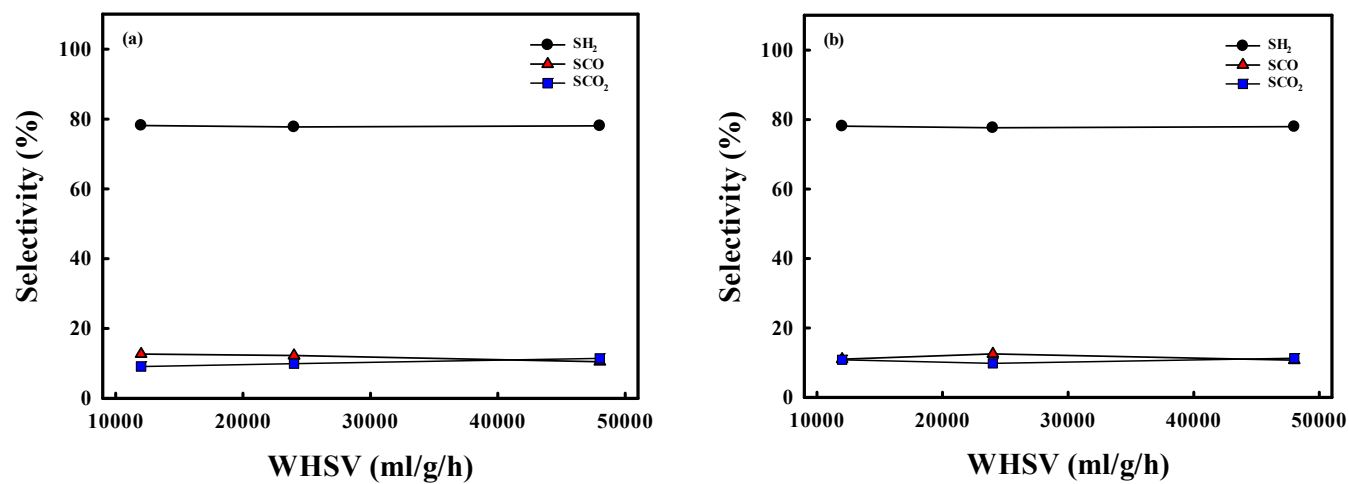

Figure S2. Selectivity of catalysts for SMR reaction at various WHSV: (a)  $\text{Ni}/\text{Al}_2\text{O}_3$  and (b)  $\text{Ru-Ni}/\text{Al}_2\text{O}_3$  catalysts

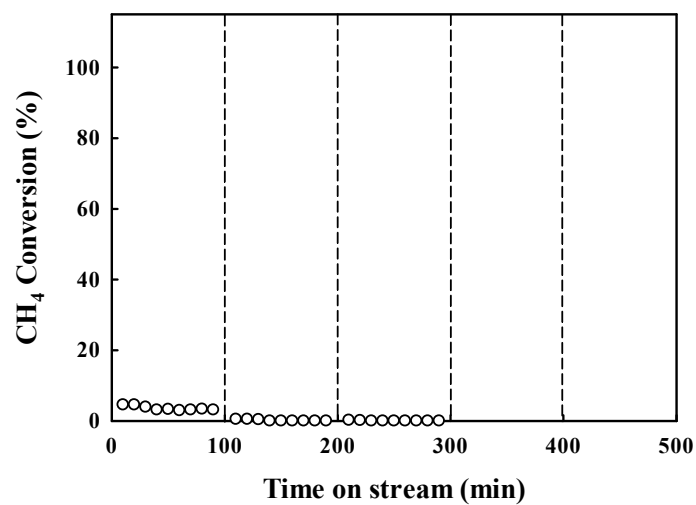

Figure S3.  $\text{CH}_4$  conversion of  $\text{Ru}/\text{Al}_2\text{O}_3$  catalysts for SMR reaction during DSS operation

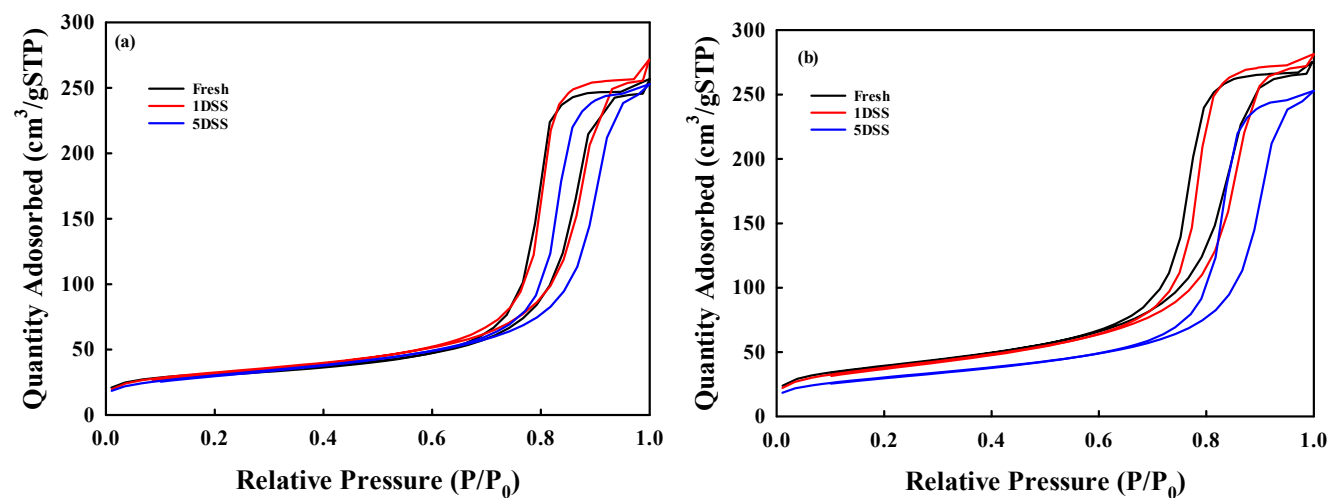

Figure S4. The  $N_2$  adsorption-desorption isotherms of catalysts: (a) Ni/Al<sub>2</sub>O<sub>3</sub> and (b) Ru-Ni/Al<sub>2</sub>O<sub>3</sub> catalysts

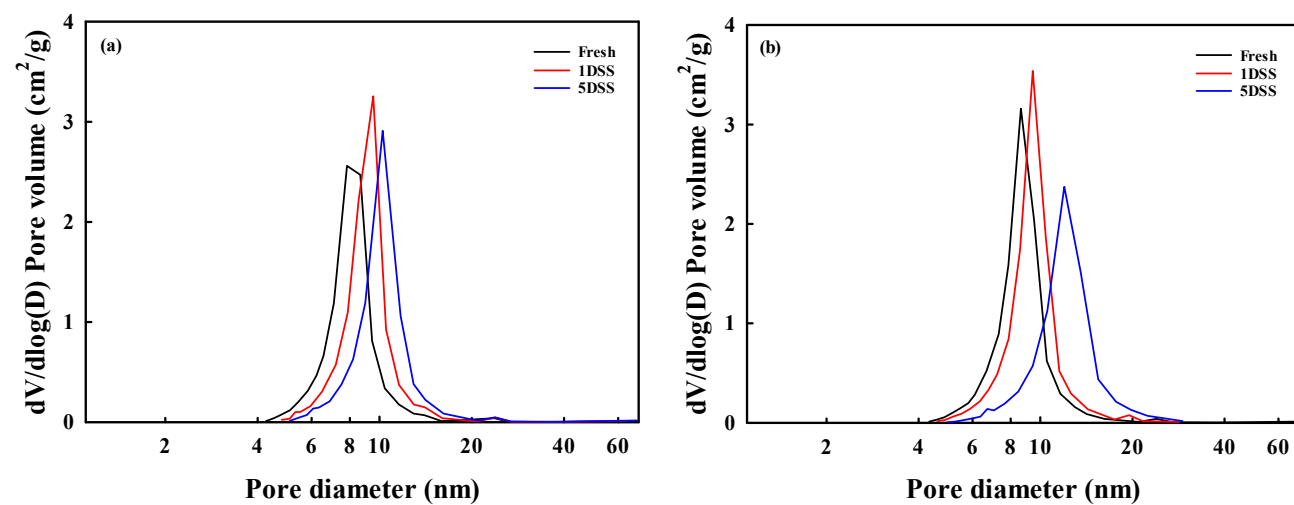

Figure S5. The pore size distributions of catalysts: (a) Ni/Al<sub>2</sub>O<sub>3</sub> and (b) Ru-Ni/Al<sub>2</sub>O<sub>3</sub> catalysts

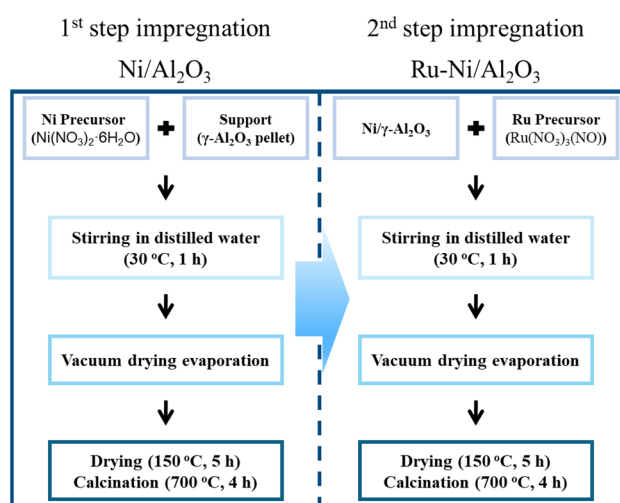

Figure S6. The scheme of the preparation of catalysts by the impregnation method.
